# Supplementary material for: Emergent conformational properties of end-tailored transversely propelling polymers
Source: Royal Society of Chemistry journal article supplement (doi:10.1039/d2sm00237j), 2022-01-01
Supplement: d2sm00237j1.pdf [file d2sm00237j1.pdf]

## Emergent conformational properties of end-tailored transversely propelling polymers: Supporting Information

K. R. Prathyusha, Falko Ziebert, and Ramin Golestanian

### DESCRIPTION OF SUPPLEMENTARY MOVIES

**1. Supplementary movie 1**

Movie showing the transverse propulsion and curving of an end-tailored polymer with  $\alpha < 1$ .  
Parameters:  $N = 25$ ,  $\alpha = 0.5$ ,  $\kappa = 500$ ,  $f_p = 5$ .

**2. Supplementary movie 2**

Movie showing the transverse propulsion and curving of an end-tailored polymer with  $\alpha > 1$ .  
Parameters:  $N = 25$ ,  $\alpha = 1.5$ ,  $\kappa = 500$ ,  $f_p = 7$ .

**3. Supplementary movie 3**

Movie showing the formation of a *2Dloop* conformation that starts to rotate.  
Parameters:  $N = 25$ ,  $\alpha = 1.5$ ,  $\kappa = 20$ ,  $f_p = 0.5$ .

**4. Supplementary movie 4**

Movie showing the formation of a *hairpin* conformation and its rotation.  
Parameters:  $N = 25$ ,  $\alpha = 1.5$ ,  $\kappa = 20$ ,  $f_p = 1$ .

**5. Supplementary movie 5**

Movie showing how a straight fiber develops the *W-shaped* flapping mode, while still propelling transversely.  
Parameters:  $N = 25$ ,  $\alpha = 1.5$ ,  $\kappa = 5$ ,  $f_p = 2$ .
